# Supplementary material for: Conditional protein splicing of the Mycobacterium tuberculosis RecA intein in its native host
Source: PubMed Central journal article supplement — Sci Rep. 2024 Sep 5;14:20664. doi: 10.1038/s41598-024-71248-y (PMC11377839; doi:10.1038/s41598-024-71248-y), 2024-09-05

## Conditional protein splicing of the *Mycobacterium tuberculosis* RecA intein in its native host

Ryan F. Schneider, Kelly Hallstrom, Christopher DeMott, Kathleen A. McDonough

### Supplemental Tables

**Table S1: Strains used in this study.**

| Strain                                                | Description                                                         | Source                                      |
|-------------------------------------------------------|---------------------------------------------------------------------|---------------------------------------------|
| mc <sup>2</sup> 6230                                  | Mtb H37Rv ( <i>ΔpanCD</i> , <i>ΔRDI</i> )                           | Gift of Dr. William Jacobs, Jr <sup>1</sup> |
| mc <sup>2</sup> 6230 <i>ΔrecA</i>                     | <i>recA</i> knockout ( <i>ΔrecA</i> , <i>ΔpanCD</i> , <i>ΔRDI</i> ) | This Paper                                  |
| <i>Mycobacterium smegmatis</i><br>mc <sup>2</sup> 155 | Parental ( <i>eptCI</i> )                                           | Acquired from BEI <sup>2,3</sup>            |
| <i>Mycobacterium smegmatis</i><br><i>ΔrecAX</i>       | mc <sup>2</sup> 155 <i>recAX</i> knockout ( <i>ΔrecAX</i> )         | Gift from Dr. Keith Derbyshire              |
| <i>E. coli</i> BLR                                    | <i>ΔrecA</i> derivative of BL21                                     | Novagen                                     |
| <i>E. coli</i> BL21                                   | For protein expression and purification                             | Novagen                                     |

**Table S2: Plasmids used in this study.**

| <b>Designation</b> | <b>Description</b>                                                                                                                                             | <b>Source</b>                            |
|--------------------|----------------------------------------------------------------------------------------------------------------------------------------------------------------|------------------------------------------|
| pMBC409            | Single Copy, integrating (AttP) vector to express transcriptional reporters or <i>recA</i> complements; Kan <sup>R</sup> , Hyg <sup>R</sup> , Amp <sup>R</sup> | Described in Girardin et al <sup>4</sup> |
| pMBC1809           | mVenus-based <i>recA</i> transcriptional reporter; Kan <sup>R</sup> , Hyg <sup>R</sup> , Amp <sup>R</sup>                                                      | This Paper                               |
| pMBC2149           | Full Mtb <i>recA</i> gene driven by native Mtb promoters; Kan <sup>R</sup> , Hyg <sup>R</sup> , Amp <sup>R</sup>                                               | This Paper                               |
| pMBC2169           | Inteinless Mtb <i>recA</i> gene driven by native Mtb promoters; Kan <sup>R</sup> , Hyg <sup>R</sup> , Amp <sup>R</sup>                                         | This Paper                               |
| pMBC2290           | Mtb N-extein driven by native Mtb promoters; Kan <sup>R</sup> , Hyg <sup>R</sup> , Amp <sup>R</sup>                                                            | This Paper                               |
| pMBC1650           | pET28a+ expressing N-extein; Kan <sup>R</sup>                                                                                                                  | This Paper                               |
| pMBC1651           | pET28A+ expressing intein; Kan <sup>R</sup>                                                                                                                    | This Paper                               |
| pMBC1652           | pET28a+ expressing C-extein; Kan <sup>R</sup>                                                                                                                  | This paper                               |

**Table S3: Primers used in this study.**

| <b>Designation</b> | <b>Sequence</b>                                                 | <b>Description</b>                              |
|--------------------|-----------------------------------------------------------------|-------------------------------------------------|
| KM4059             | gggggatcctctagatttaagaaggagatatacatatggtgag<br>caagggcgaggagctg | mVenus forward                                  |
| KM4138             | gggaagctttgatcaccgcgccatg                                       | mVenus reverse                                  |
| KM4194             | tgcaagtggatcccgcaccgccagg                                       | <i>recA</i> promoter forward                    |
| KM4195             | cctagtggatcccatggtgcctctcctgtg                                  | <i>recA</i> promoter reverse                    |
| KM4345             | agagatatacgcccgagtg                                             | <i>recA</i> qRT                                 |
| KM4346             | ccgagcttcttgcatagtc                                             | <i>recA</i> qRT                                 |
| KM4290             | acgtaaacggccacaagttc                                            | GFPv qRT                                        |
| KM4291             | aagtcgtgctgcttcatgtg                                            | GFPv qRT                                        |
| KM3727             | gggaattcacgcagacccccgatcgg                                      | <i>recA</i> NE for protein purification fwd     |
| KM3728             | ggaagctttcactgttcttgacgacctgac                                  | <i>recA</i> NE for protein purification rev     |
| KM3729             | gggaattctgcctcgcagagggc                                         | <i>recA</i> intein for protein purification fwd |
| KM3730             | ggaagctttcaacagttgtgcacgacaacc                                  | <i>recA</i> intein for protein purification rev |
| KM3731             | gggaattctcgccccctcaagca                                         | <i>recA</i> CE for protein purification fwd     |
| KM3732             | gggagctctcagaagtcgacggggg                                       | <i>recA</i> CE for protein purification rev     |
| KM5105             | gatatcgtgtgagcagatcgctcggtgatccgga                              | <i>recA</i> full complement fwd                 |
| KM5106             | gcgccgctcagaagtcgacggggcg                                       | <i>recA</i> full complement rev                 |
| KM5584             | gatatcgctgctcttcgctcagaag                                       | <i>recA</i> inteinless complement NE fwd        |
| KM5585             | caagtcgtcaagaacaagtgttcgccccctcaagcagg                          | <i>recA</i> inteinless complement NE rev        |
| KM5586             | gaagggggggaacactgttcttgacgacctgacctggg                          | <i>recA</i> inteinless complement CE fwd        |
| KM5587             | gatatcgacgccgaaggtcagatccgg                                     | <i>recA</i> inteinless complement CE rev        |
| KM6016             | aagcttgagcagatcgctcggtgatc                                      | <i>recA</i> N-Extein only complement fwd        |
| KM6017             | aagcttactgttcttgacgacctgac                                      | <i>recA</i> N-Extein only complement rev        |
| KM4413             | ttgaccaggctgtagcgggagtct                                        | Hygromycin resistance cassette fwd              |
| KM4414             | ccgctgaccgggaacacctgctc                                         | Hygromycin resistance cassette fwd              |
| KM5107             | ctgttcttgacgacctgacctggg                                        | N-extein reverse (to check KO)                  |

Supplemental Figures for

Conditional protein splicing of the *Mycobacterium tuberculosis* RecA intein in its native host

Ryan F. Schneider, Kelly Hallstrom, Christopher DeMott, Kathleen A. McDonough

Figure S1

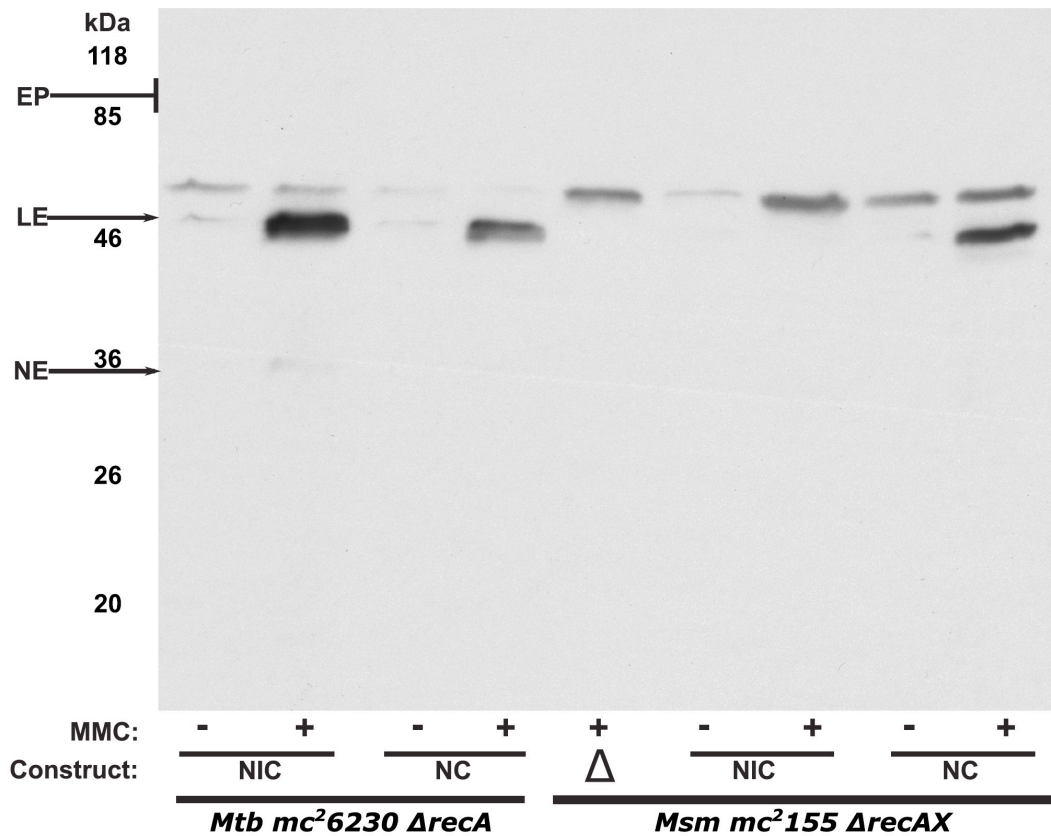

**Figure S1:** RecA precursor was not detected in other mycobacteria. *M. tuberculosis* *ΔrecA* and *M. smegmatis* *ΔrecAX* were complemented with intein-containing *recA* (NIC) or inteinless *recA* (NC) alleles driven by their native mycobacterial promoters. Cells were grown to mid-log and treated for 3 days with Mitomycin C to induce *recA* transcription and RecA production. Protein from cultures was harvested for western blotting against the N-extein, which detects ligated exteins (LE) and the N-extein (NE) as well as precursor (see Figure 1B). EP: expected size of precursor RecA, which was not detected.

Figure S2

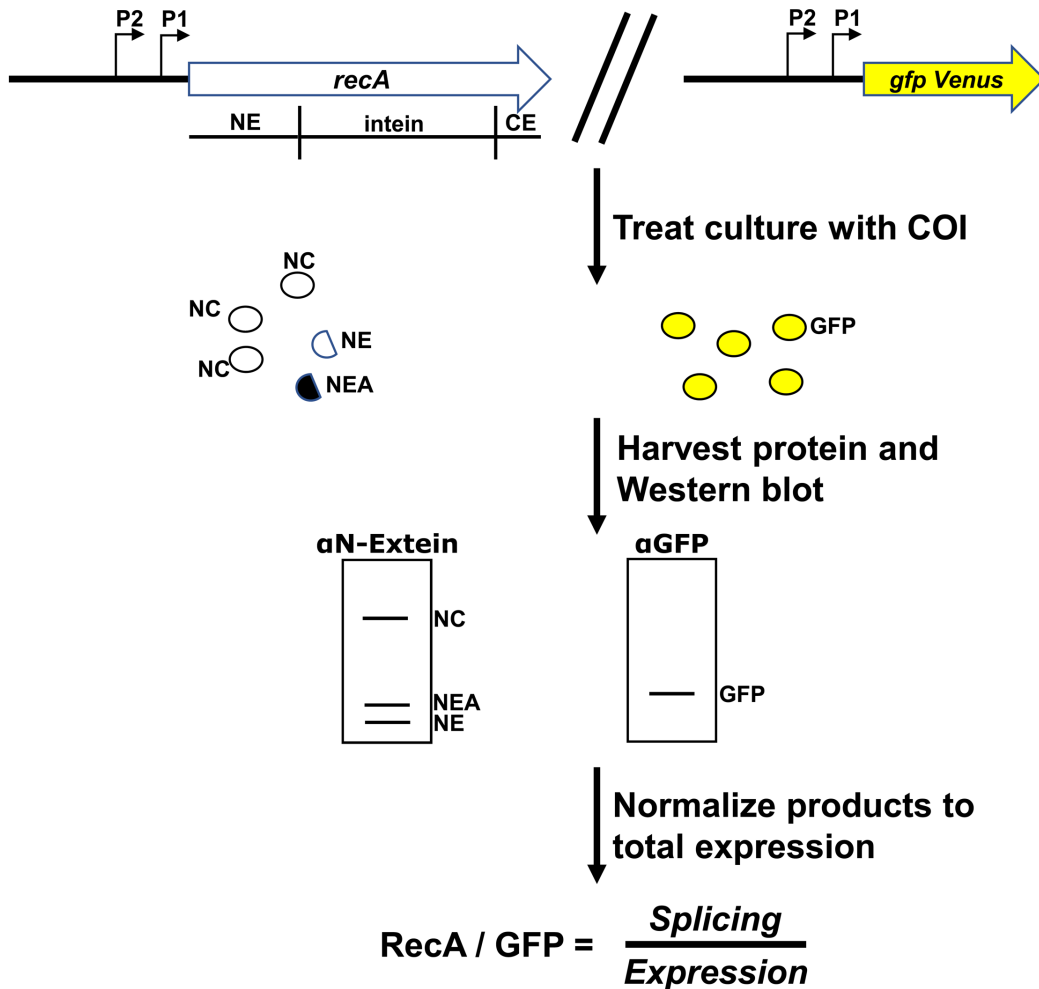

**Figure S2:** Schematic of experimental setup and analysis. Mtb auxotroph mc<sup>2</sup>6230 harboring a native *recA* allele and a *gfp* allele driven by the native Mtb *recA* promoters is grown to the desired phase and treated with conditions of interest (COI). If treatment induces *recA* production, RecA products and GFP will be made at a higher level compared to untreated. After treatment, total protein lysate is extracted and subjected to western blotting targeting the N-extein (left), GFP (right) or Intein (not shown). Western blots are quantitated by densitometry and the ratio of RecA product to GFP is calculated to normalize for changes in transcriptional expression.

Figure S3

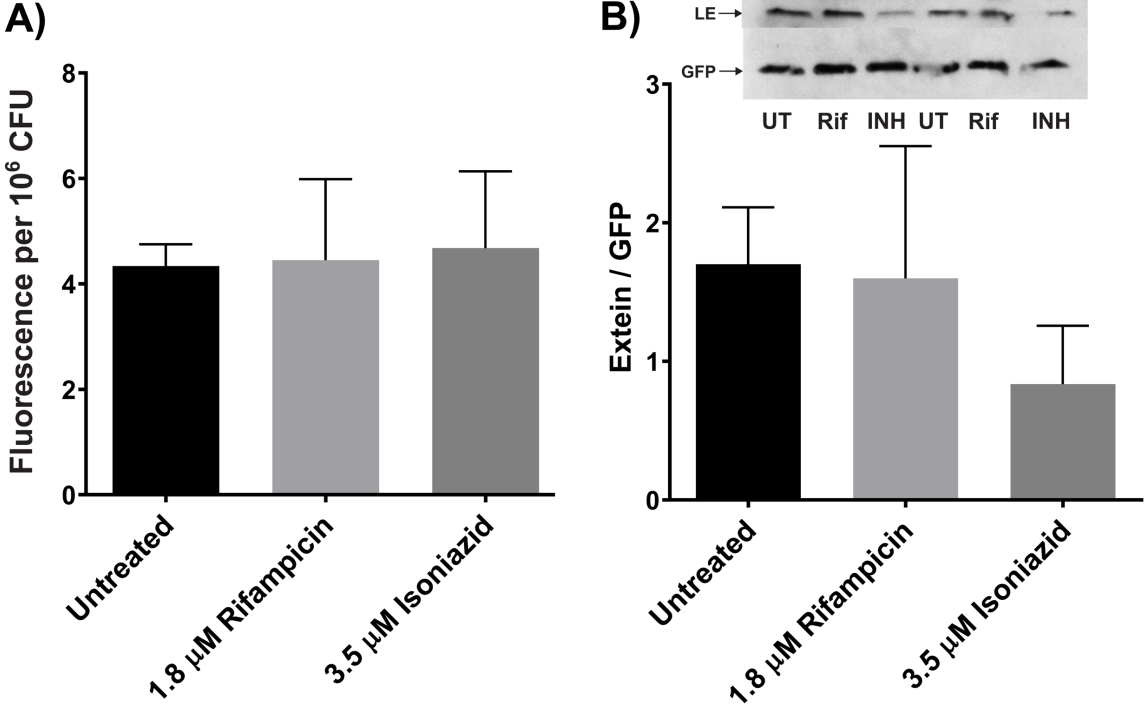

**Figure S3:** First-line therapeutics rifampicin and Isoniazid do not induce the *recA* transcription or RecA splicing. Mtb auxotrophic strain mc<sup>2</sup>6230 harboring our *recA* transcriptional reporter was grown to mid-log phase and then treated with rifampicin or isoniazid. (A) *recA* transcription in response to the two therapeutics as read by our GFP based transcriptional reporter system. (B) Western blot of RecA production in response to rifampicin or isoniazid. Error bars represent standard deviation of two biological repeats.

Figure S4

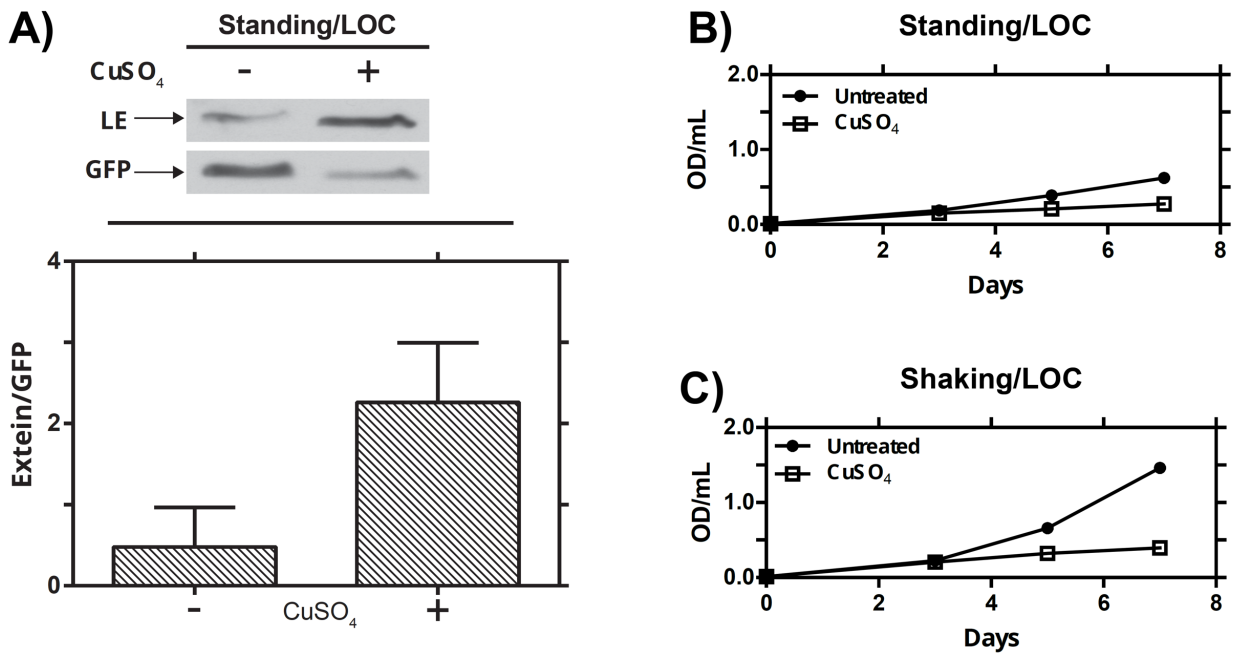

**Figure S4:** Growth does not affect copper-induced splicing. *Mtb* cultures starting at OD0.035 were grown in the presence or absence of copper for seven days either standing or shaking in low oxygen conditions supplemented with carbon dioxide (LOC). Copper was added at the time cultures were started. A) Representative western blot with quantitative analysis of RecA ligated extein (LE) produced in response to copper in standing LOC. Error bars represent standard deviation of three biological repeats. B) Optical density of cultures grown in standing LOC conditions with copper absent (black circle) or present (open square). C) Optical densities of cultures grown in shaking LOC conditions with copper absent (black circle) or present (open square).

Figure S5

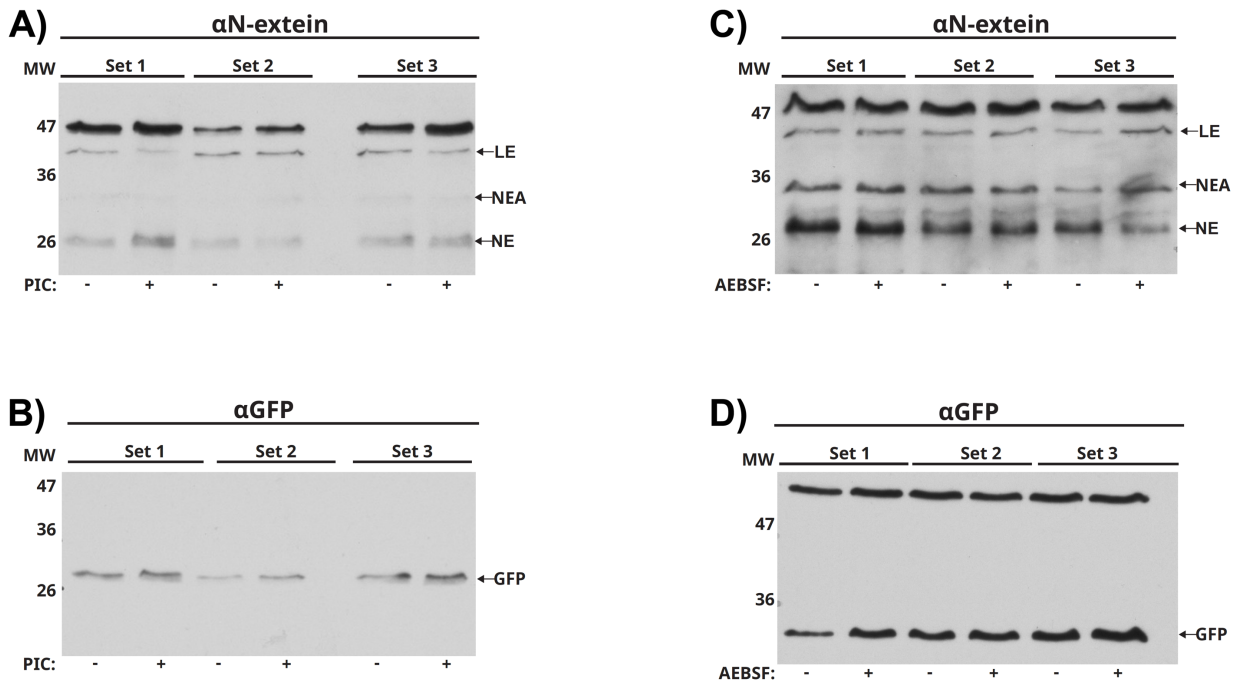

**Figure S5:** Treatment with protease inhibitors does not affect levels of RecA or intein. *Mtb mc<sup>2</sup>6230* harboring a native *recA* allele and a *gfp* allele driven by the native *Mtb recA* promoters was grown to (A, B) mid-log phase before treating with 1:1000 dilution of Sigma Aldrich's protease inhibitor cocktail for 24hrs in triplicate. (A) Western blot analysis targeting the N-extein. (B) Western blot analysis targeting GFP. (C-D) *Mtb mc<sup>2</sup>6230* harboring a native *recA* allele and a *gfp* allele driven by the native *recA* promoters was grown to late-log phase and treated with AEBSF for 48hrs in triplicate. Western blot analysis targeted the N-extein (C) or GFP (D).



Figure S6

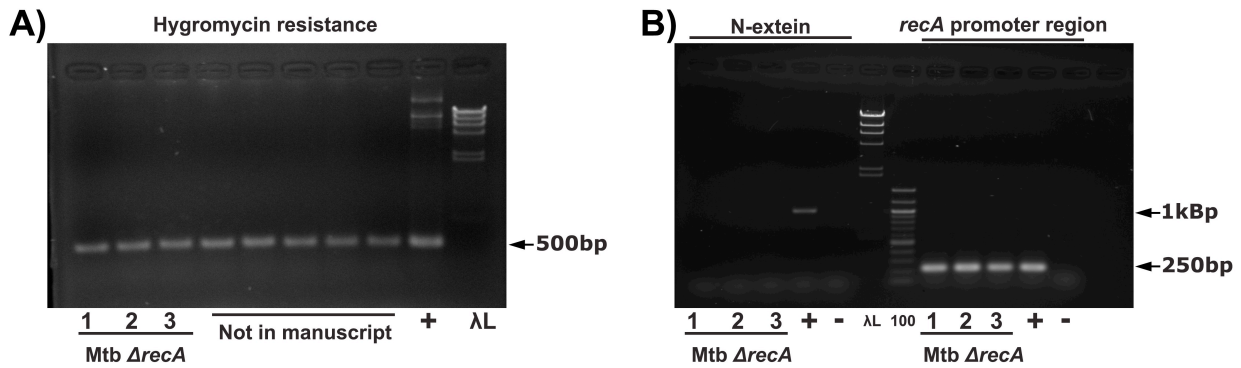

**Figure S6:** PCR confirming knockout of the *recA* gene in *mc*<sup>2</sup>6230. (A) PCR targeting a ~500bp section of the hygromycin resistance cassette encoded on the phagemid (negative water only control not shown). (B) PCR targeting either the *recA* promoter region + N-extein (~1kb) or the *recA* promoter region (~230bp). The positive control for PCRs was heat-killed H37Rv and the negative control was water only. λL: NEB lambda phage DNA digested with HindIII. 100: NEB's 100bp ladder.

### References for supplemental information:

1. Sambandamurthy, V.K. *et al.* *Mycobacterium tuberculosis* DeltaRD1 DeltapanCD: a safe and limited replicating mutant strain that protects immunocompetent and immunocompromised mice against experimental tuberculosis. *Vaccine* **24**, 6309-6320 (2006).
2. Snapper, S.B., Melton, R.E., Mustafa, S., Kieser, T. & Jacobs, W.R., Jr. Isolation and characterization of efficient plasmid transformation mutants of *Mycobacterium smegmatis*. *Mol Microbiol* **4**, 1911-1919 (1990).
3. Panas, M.W. *et al.* Noncanonical SMC protein in *Mycobacterium smegmatis* restricts maintenance of *Mycobacterium fortuitum* plasmids. *Proc Natl Acad Sci U S A* **111**, 13264-13271 (2014).
4. Girardin, R.C. & McDonough, K.A. Small RNA Mcr11 requires the transcription factor AbmR for stable expression and regulates genes involved in the central metabolism of *Mycobacterium tuberculosis*. *Mol Microbiol* **113**, 504-520 (2020).

**Supplementary compilation of full gel images used for western blots shown in:**

Conditional protein splicing of the *Mycobacterium tuberculosis* RecA intein in its native host  
Ryan F. Schneider, Kelly Hallstrom, Ph.D., Christopher DeMott, Ph.D., Kathleen A. McDonough, Ph.D.

**Figure 1B (Right)**  
 **$\alpha$ N-Extein**

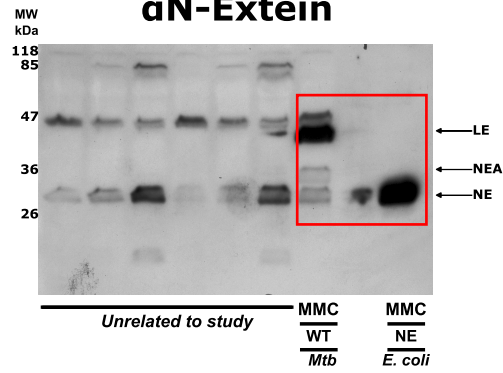

**Figure 1C**  
 **$\alpha$ N-Extein**

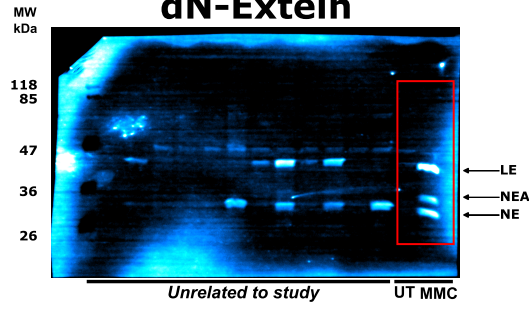

**Figure 1C**  
 **$\alpha$ C-Extein**

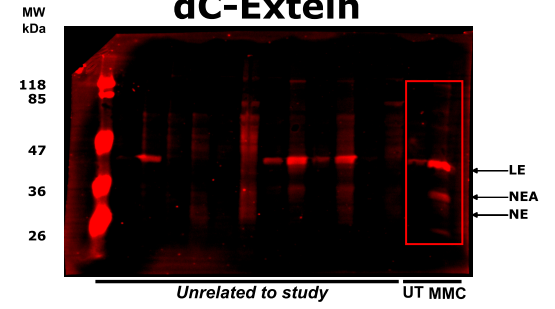

**Figure 2A**  
 **$\alpha$ Intein**

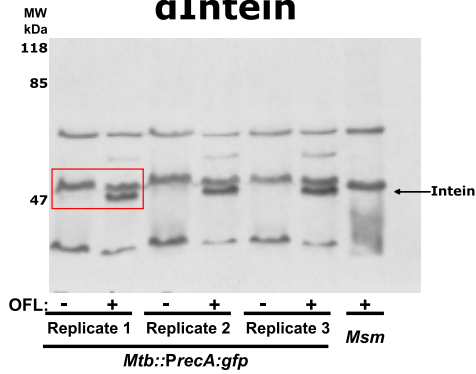

**Figure 2B**  
 **$\alpha$ N-Extein**

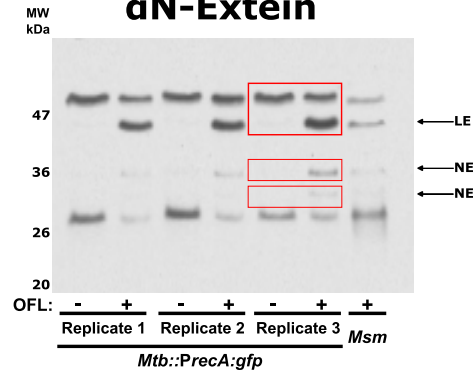

**Figure 2A,B**  
 **$\alpha$ GFP**

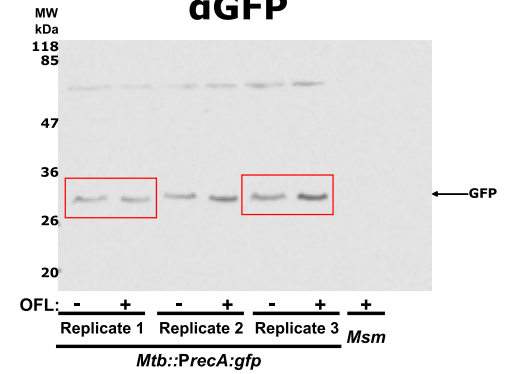

**Figure 2C**  
 **$\alpha$ Intein**

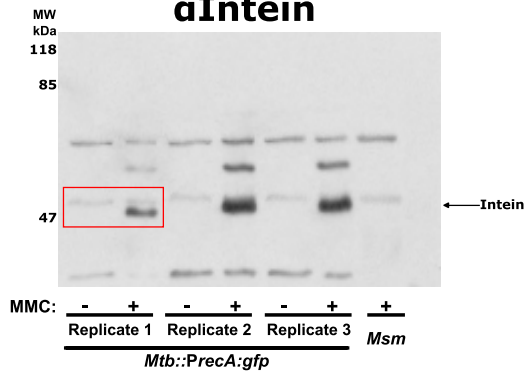

**Figure 2D**  
 **$\alpha$ N-Extein**

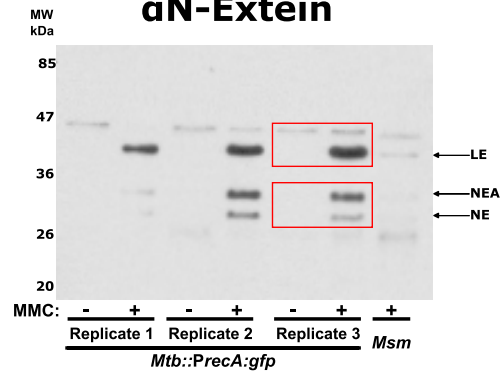

**Figure 2C,D**  
 **$\alpha$ GFP**

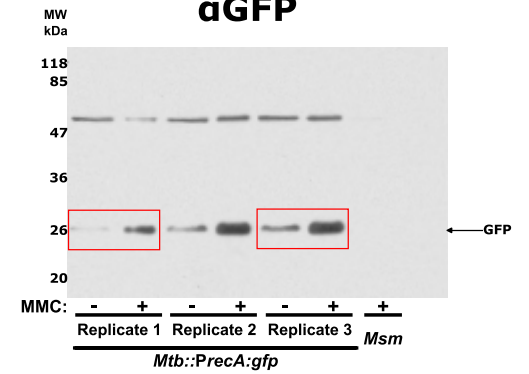

**Figure 3A**  
**αIntein**

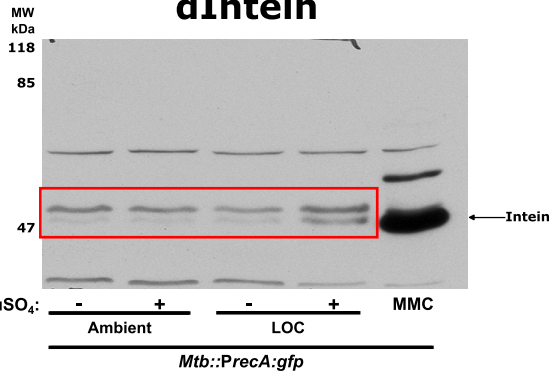

**Figure 3A**  
**αGFP**

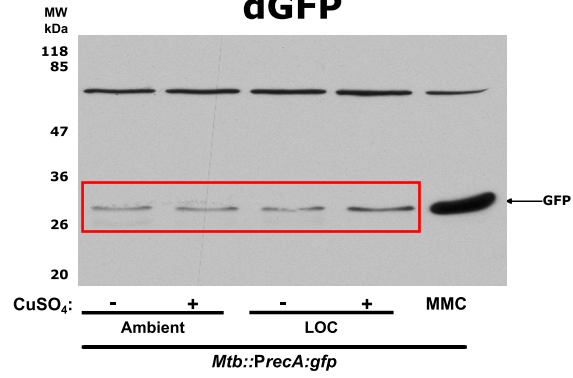

**Figure 3B**  
**αN-Extein**

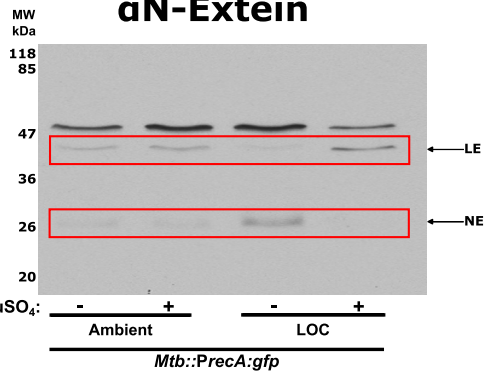

**Figure 3B**  
**αGFP**

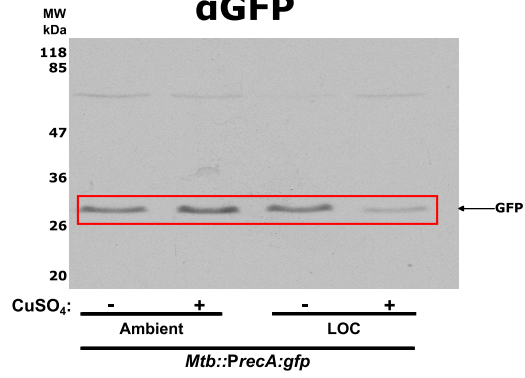

**Figure 3C**  
**αIntein**

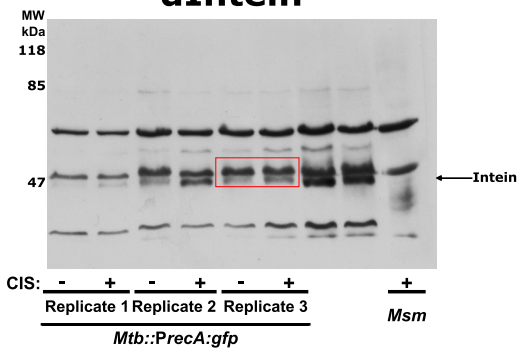

**Figure 3D**  
**αN-Extein**

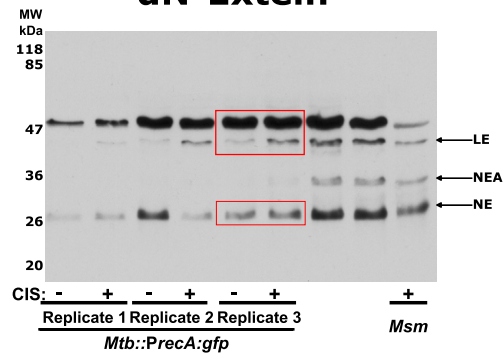

**Figure 3C,D**  
**αGFP**

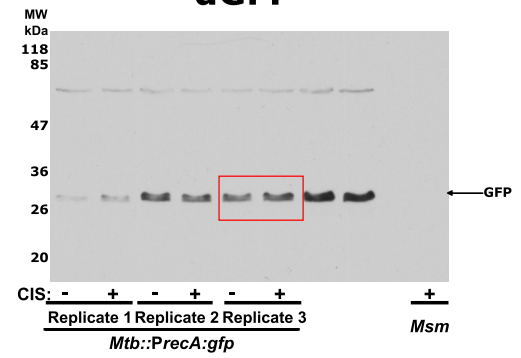

**Figure 4A**  
**αIntein**

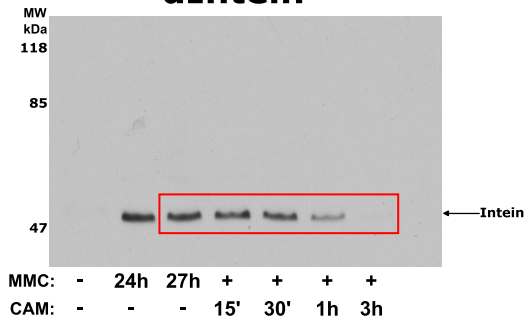

**Figure 4A**  
**αGFP**

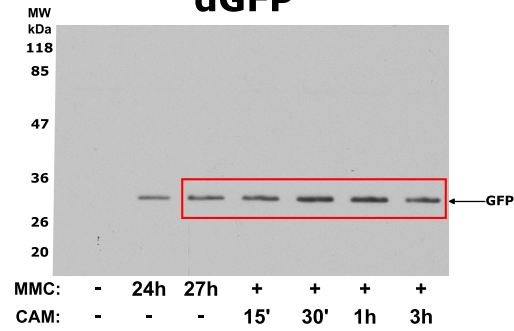

**Figure 4B**  
**αN-Extein**

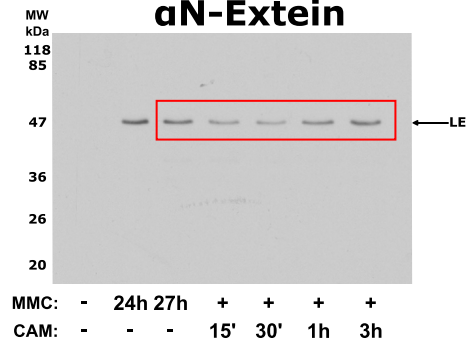

**Figure 4B**  
**αGFP**

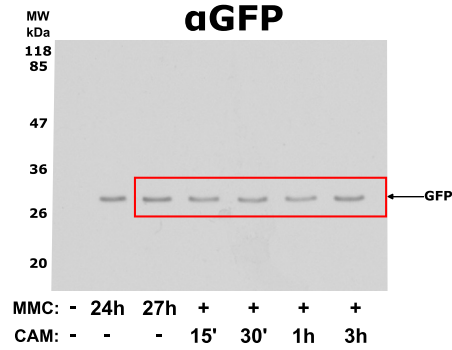

**Figure 4D**  
**αN-extein**

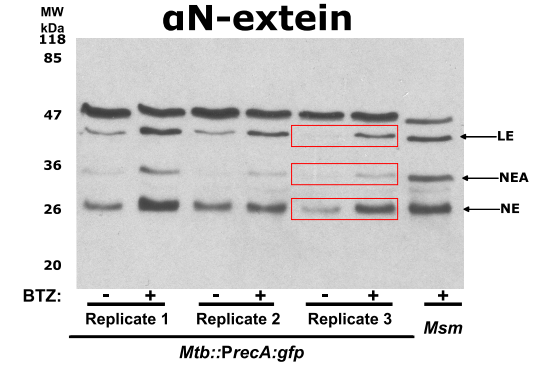

**Figure 4C**  
**αIntein**

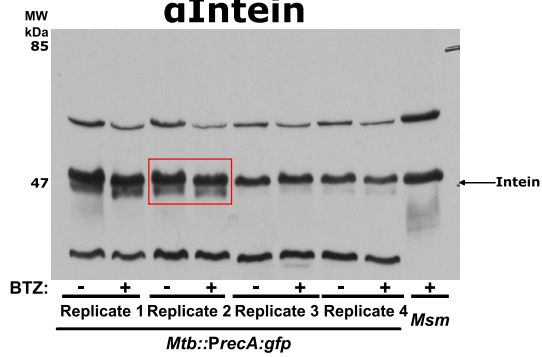

**Figure 4C**  
**αGFP**

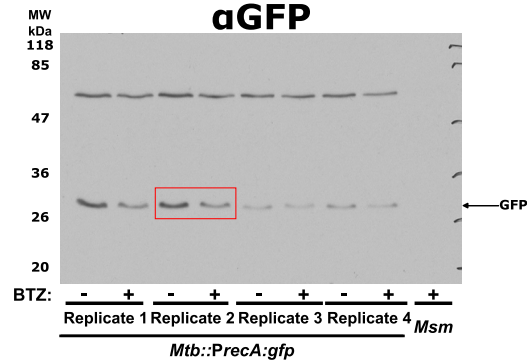

**Figure 4D**  
**αGFP**

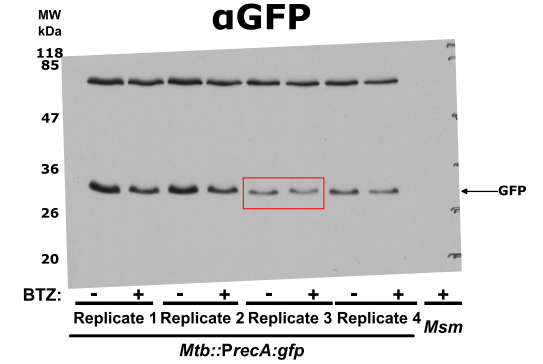

**Figure 5D Inset**

**$\alpha$ LexA**

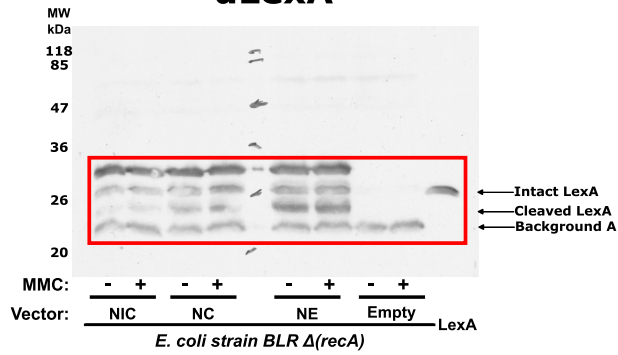

**Figure S3B**

**$\alpha$ N-Extein**

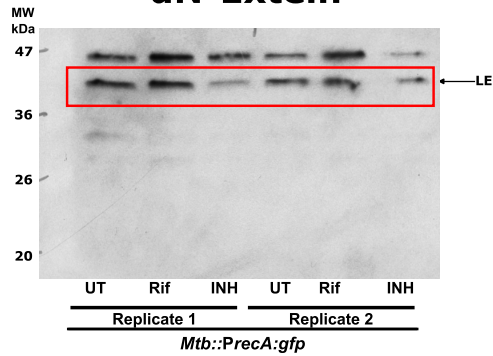

**Figure S3B**

**$\alpha$ GFP**

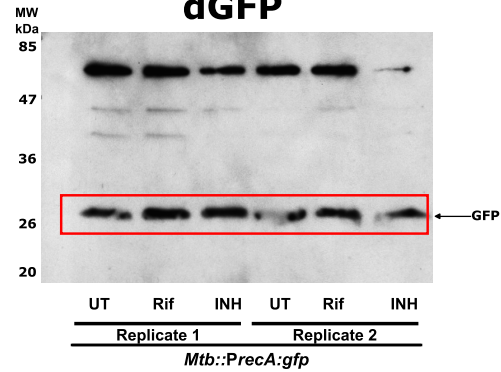

**Figure S4A**

**$\alpha$ N-Extein**

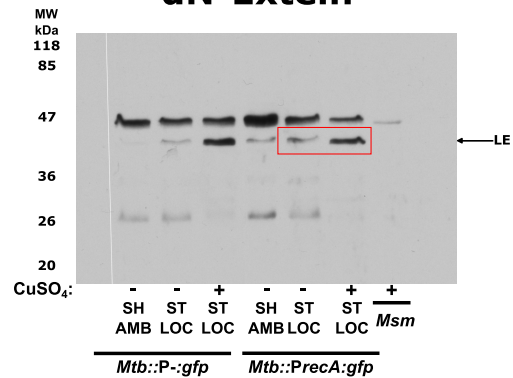

**Figure S4A**

**$\alpha$ GFP**

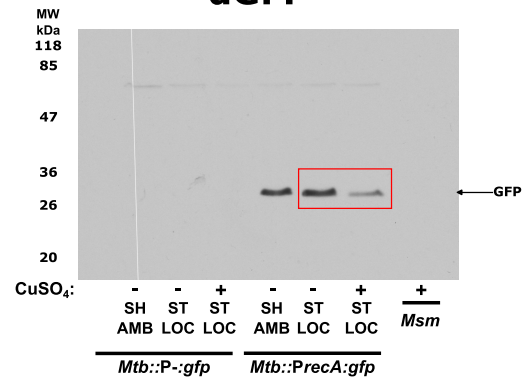

Supplement: 41598_2024_71248_MOESM1_ESM.pdf [file 41598_2024_71248_MOESM1_ESM.pdf]
